# Supplementary material
Source: MDPI journal article supplement (https://www.mdpi.com/2073-4395/11/11/2196)
Supplement: s1 [file s1]

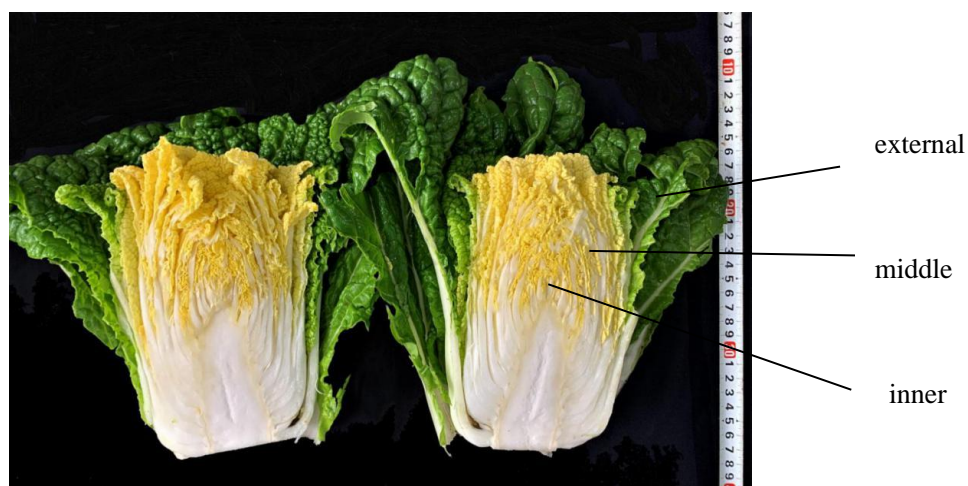

Figure S1 Sampling location: the same part was taken respectively, the outer green leaves, the middle yellow leaves and the inner core leaves

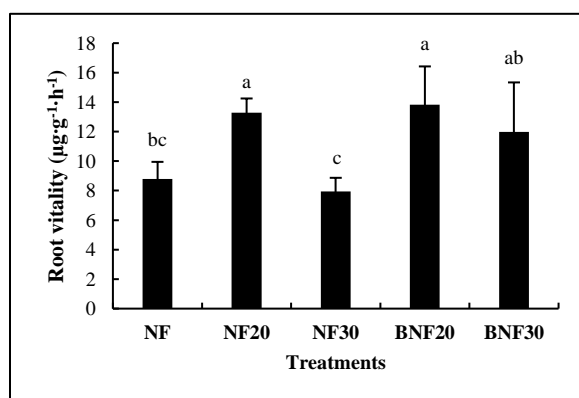

Figure.S2 Effects of different fertilization treatments on activity of 'yellow rose' cabbage root

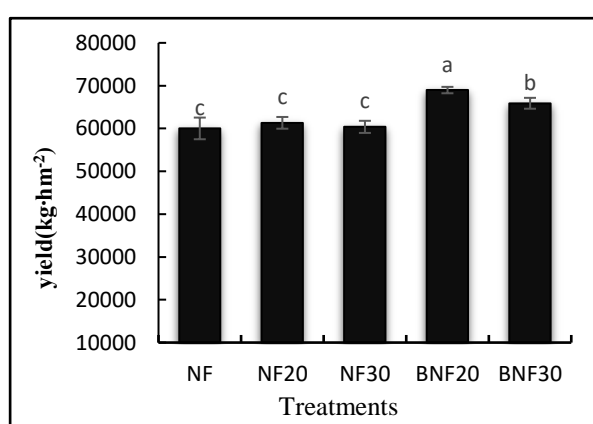

Figure.S3 The yield of next year plant

TableS1 Effects of different fertilization treatments on photosynthetic characteristics of 'yellow rose' cabbage (Harvest period)

| Treatments | $P_n$<br>( $\mu\text{mol}\cdot\text{m}^{-2}\cdot\text{s}^{-1}$ ) | $G_s$<br>( $\text{mmol}\cdot\text{m}^{-2}\cdot\text{s}^{-1}$ ) | $C_i$<br>( $\mu\text{mol}\cdot\text{mol}^{-1}$ ) | $T_r$<br>( $\text{mmol}\cdot\text{m}^{-2}\cdot\text{s}^{-1}$ ) |
|------------|------------------------------------------------------------------|----------------------------------------------------------------|--------------------------------------------------|----------------------------------------------------------------|
| NF         | 19.6±0.95b                                                       | 0.5±0.11a                                                      | 294.3±8.50a                                      | 2.7±0.26b                                                      |
| NF20       | 22.2±0.58a                                                       | 0.6±0.07a                                                      | 298.9±6.37a                                      | 3.9±0.19a                                                      |
| NF30       | 21.7±0.73ab                                                      | 0.6±0.09a                                                      | 308.5±6.16a                                      | 3.4±0.36ab                                                     |
| BNF20      | 23.0±0.62a                                                       | 0.8±0.15a                                                      | 307.3±5.60a                                      | 3.6±0.31ab                                                     |
| BNF30      | 22.1±0.84a                                                       | 0.5±0.05a                                                      | 297.1±8.50a                                      | 3.3±0.48ab                                                     |
